# Supplementary material for: SMAD2/3 signaling in the uterine epithelium controls endometrial cell homeostasis and regeneration
Source: PubMed Central journal article supplement (PMC10008566; doi:10.1038/s42003-023-04619-2), 2023-03-11
Supplement: 42003_2023_4619_MOESM2_ESM.pdf [file 42003_2023_4619_MOESM2_ESM.pdf]

## SUPPLEMENTAL FILES AND TABLES

### **SMAD2/3 signaling in the uterine epithelium controls endometrial cell homeostasis and regeneration**

Maya L. Kriseman<sup>a,b,c</sup>, Suni Tang<sup>a,b</sup>, Zian Liao<sup>a,b,d</sup>, Peixin Jiang<sup>a,e</sup>, Sydney E. Parks<sup>a,b,f</sup>, Dominique I. Cope<sup>a,b</sup>, Fei Yuan<sup>a,b</sup>, Fengju Chen<sup>g,h</sup>, Ramya P. Masand<sup>a</sup>, Patricia D. Castro<sup>a</sup>, Michael M. Ittmann<sup>a</sup>, Chad J. Creighton<sup>g,h</sup>, Zhi Tan<sup>a,b</sup>, and Diana Monsivais<sup>a,b,f,h\*</sup>

<sup>a</sup>Department of Pathology and Immunology, Baylor College of Medicine, Houston, TX 77030

<sup>b</sup>Center for Drug Discovery, Baylor College of Medicine, Houston, TX 77030

<sup>c</sup>Division of Reproductive Endocrinology and Infertility, Baylor College of Medicine, Houston, TX 77030

<sup>d</sup>Department of Molecular and Human Genetics, Baylor College of Medicine, Houston, TX 77030

<sup>e</sup>Department of Thoracic/Head and Neck Medical Oncology, the University of Texas MD Anderson Cancer Center, Houston, TX 77030

<sup>f</sup>Cancer and Cell Biology Program, Baylor College of Medicine, Houston, TX, 77030

<sup>g</sup>Department of Medicine, Baylor College of Medicine, Houston, TX 77030

<sup>h</sup>Dan L. Duncan Comprehensive Cancer Center, Baylor College of Medicine, Houston, TX 77030

## Supplementary Fig. 1

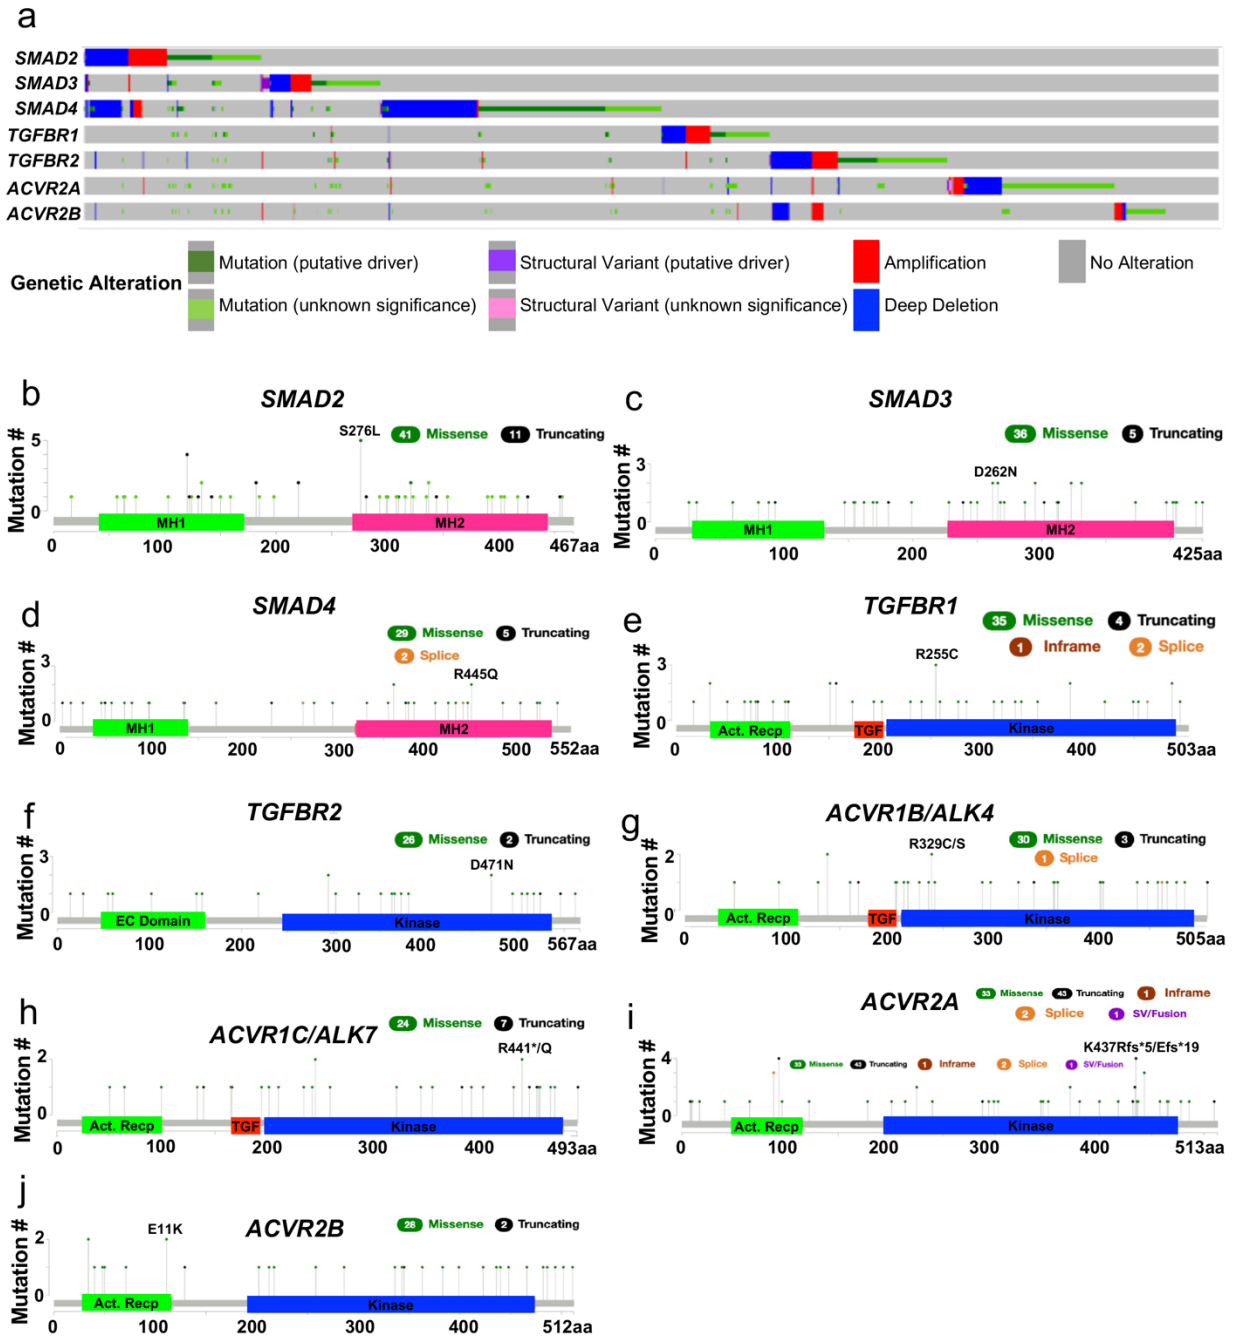

**Supplementary Fig. 1: Mutations in the TGF $\beta$  signaling pathway in endometrial tumors.** A dataset of 894 patients was queried for the presence of mutations in the TGF $\beta$  signaling pathway (a). This figure shows an overview of the mutations found in the coding regions for *SMAD2*, *SMAD3*, *SMAD4* (b-d), and in the various TGF $\beta$  receptors (e-j) that can activate SMAD2/3 signaling. Data represent analysis of 894 patients from the cBioPortal consortium. b-j Individual mutations for each of the transcription factors, *SMAD2*, *SMAD3*, *SMAD4* and TGF $\beta$  receptors, *TGFBR1*, *TGFBR2*, *ACVR1B*, *ACVR1C*, *ACVR2A*, and *ACVR2B*. The most frequent mutation is noted as well as the predicted effect of the mutation (missense, truncating, in-frame, etc).

Supplementary Fig. 2

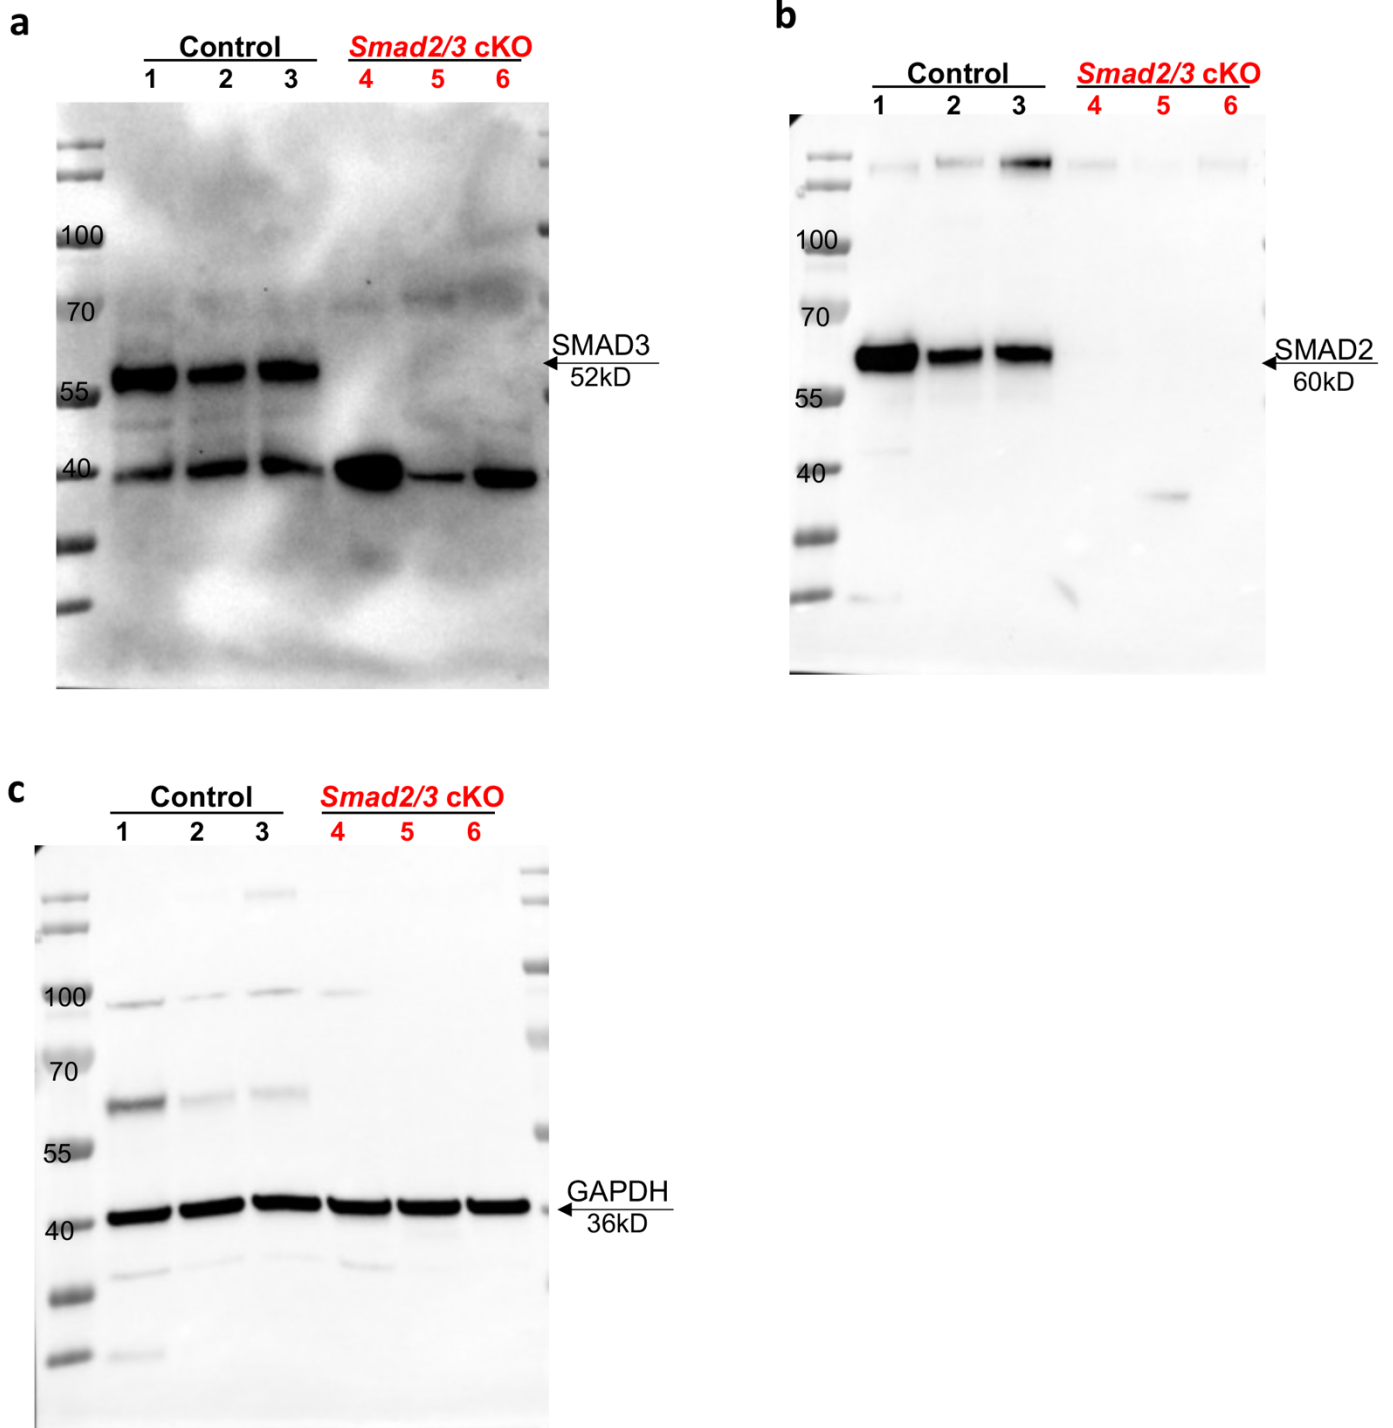

Supplementary Fig. 2: Uncropped western blot images for Fig. 1d. Western blot images for SMAD3 (a), SMAD2 (b), and GAPDH (c), respectively.



Supplementary Fig. 3

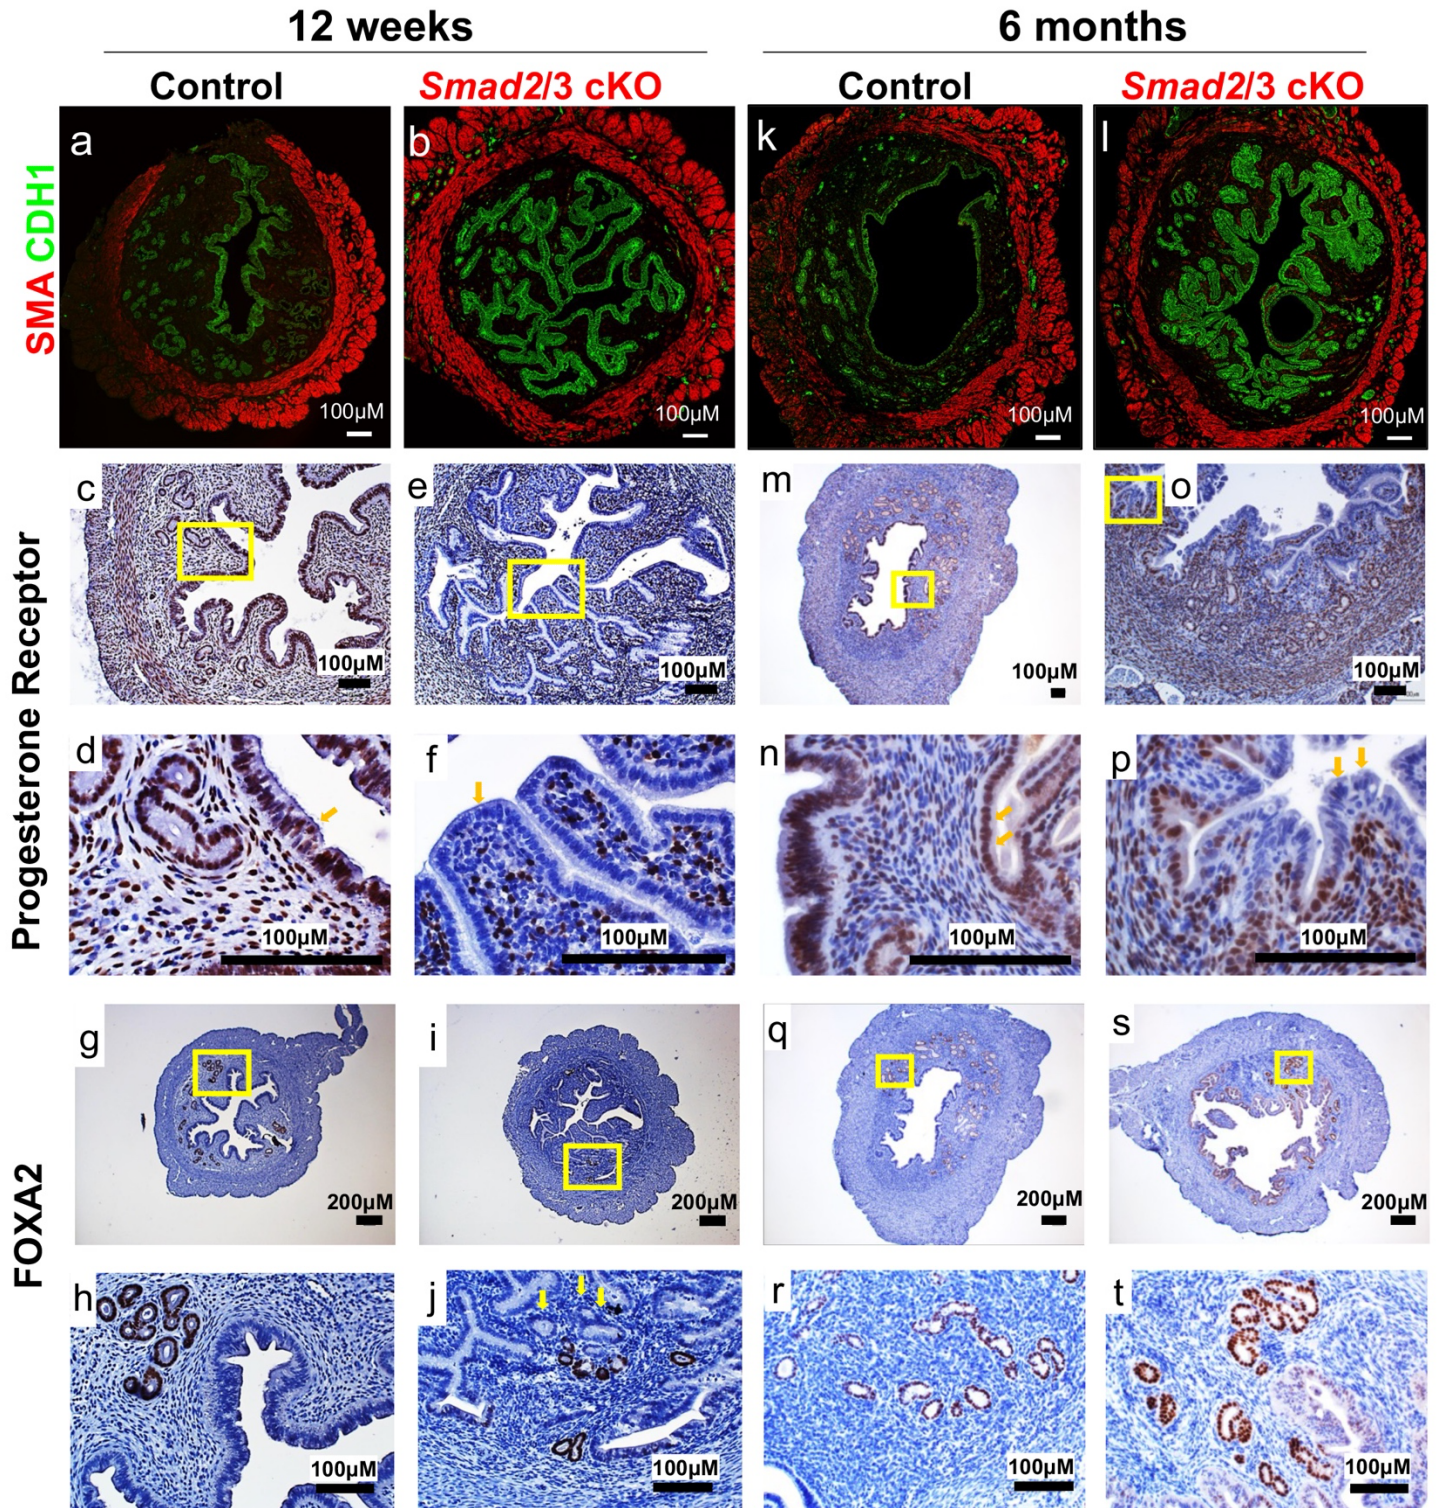

**Supplementary Fig. 3: Mice with double SMAD2/3 conditional deletion develop hyperplasia and lose progesterone receptor expression.** Uterine cross-sections from 12-week-old mice (a,b) and 6-month-old mice (k, l) stained with the myometrial marker, smooth muscle actin (SMA, red) and the epithelial cell marker, E-cadherin (CDH1, green) in control (a, k) and *Smad2/3* cKO (b, l) mice. E-



cadherin staining shows that hyperplasia is detected in the uteri of *Smad2/3* cKO mice starting at 12-weeks of age and worsening by 6-months of age. **c-f, m-p** Progesterone receptor (PR) immunohistochemistry (IHC) in uterine cross-sections from 12-week-old (**c-f**) and 6-month-old (**m-p**) mice. Results show that compared to controls (**c-d, m-n**), *Smad2/3* cKO mice (**e-f, o-p**) had decreased PR levels in the uterine epithelium (indicated by yellow arrows in **d, f, n, p**). **g-j, q-t** Uterine cross sections from control (**g-h, q-r**) and *Smad2/3* cKO mice (**i-j, s-t**) showing that FOXA2 expression is expressed in the uterine glands of both genotypes at 12 weeks (**g-j**) and 6 months of age (**q-t**).

Supplementary Fig. 4

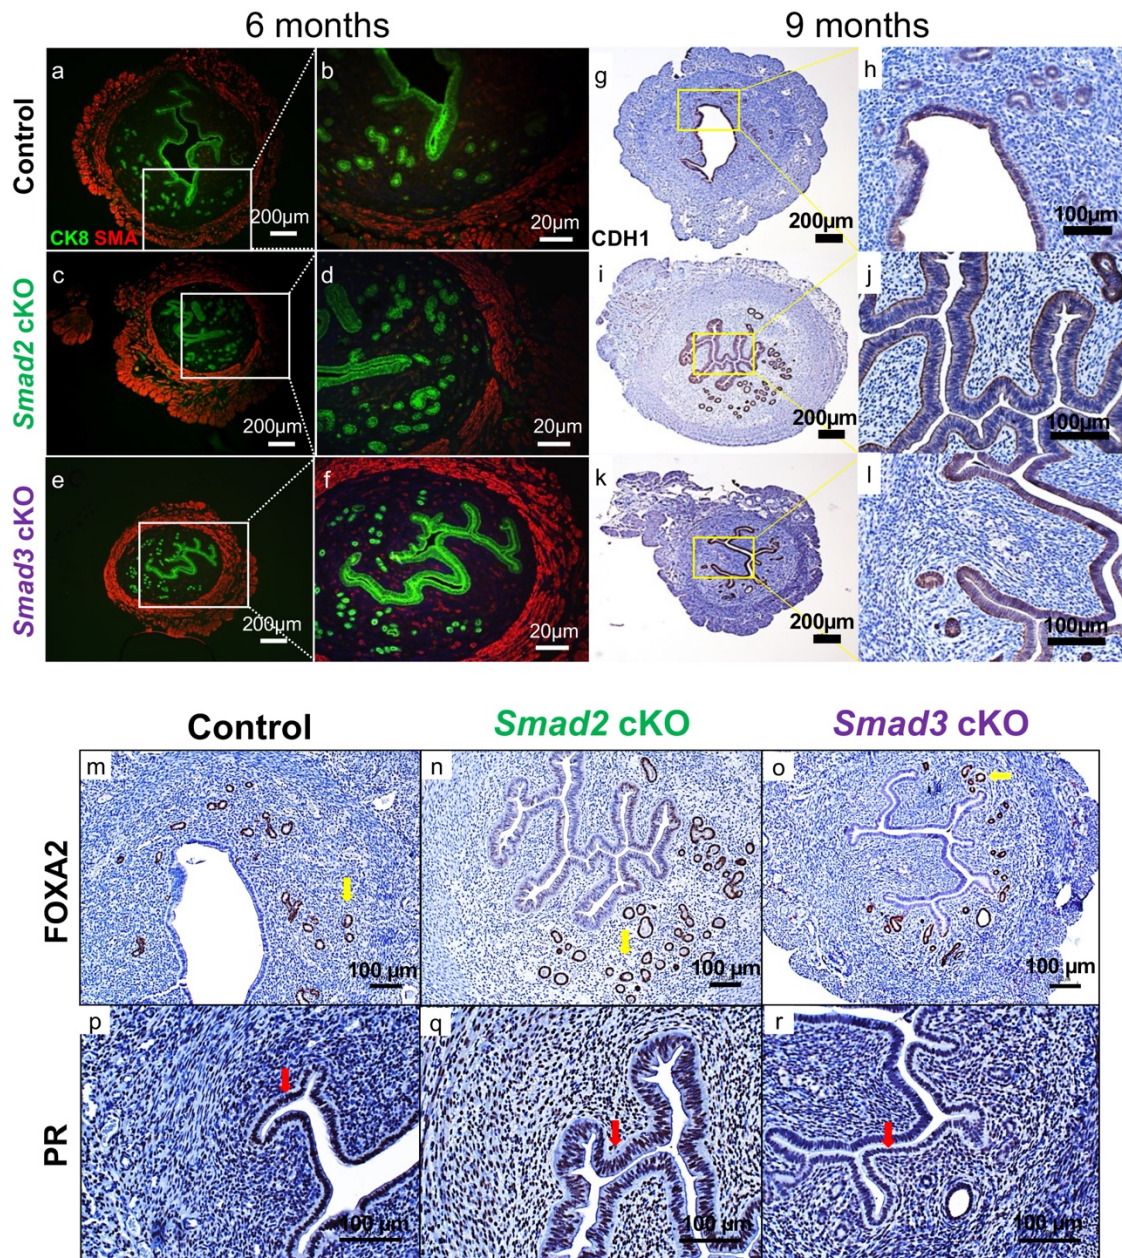

**Supplementary Fig. 4: Morphological analysis of uteri from control and single *Smad2* cKO and *Smad3* cKO mice.** **a-f** Cross sections of 6-month-old virgin mice from control (**a-b**), *Smad2* cKO (**c-d**), and *Smad3* cKO (**e-f**) mice stained with cytokeratin 8 (CK8, green) and smooth muscle actin (SMA, red). **g-i** Histological analysis of 9-month-old control (**g-h**), *Smad2* cKO (**i-j**), and *Smad3* cKO (**k-l**) stained with E-cadherin. Mice had been mated during 6 months as part of a breeding trial. **m-n** Uterine cross sections of control (**m**), *Smad2* cKO (**n**), and *Smad3* cKO (**o**) mice stained with the glandular cell marker, FOXA2. **p-r** Uterine cross-sections from control (**p**), *Smad2* cKO (**q**) and *Smad3* cKO (**r**) mice stained with progesterone receptor (PR) antibody.

## Supplementary Fig. 5

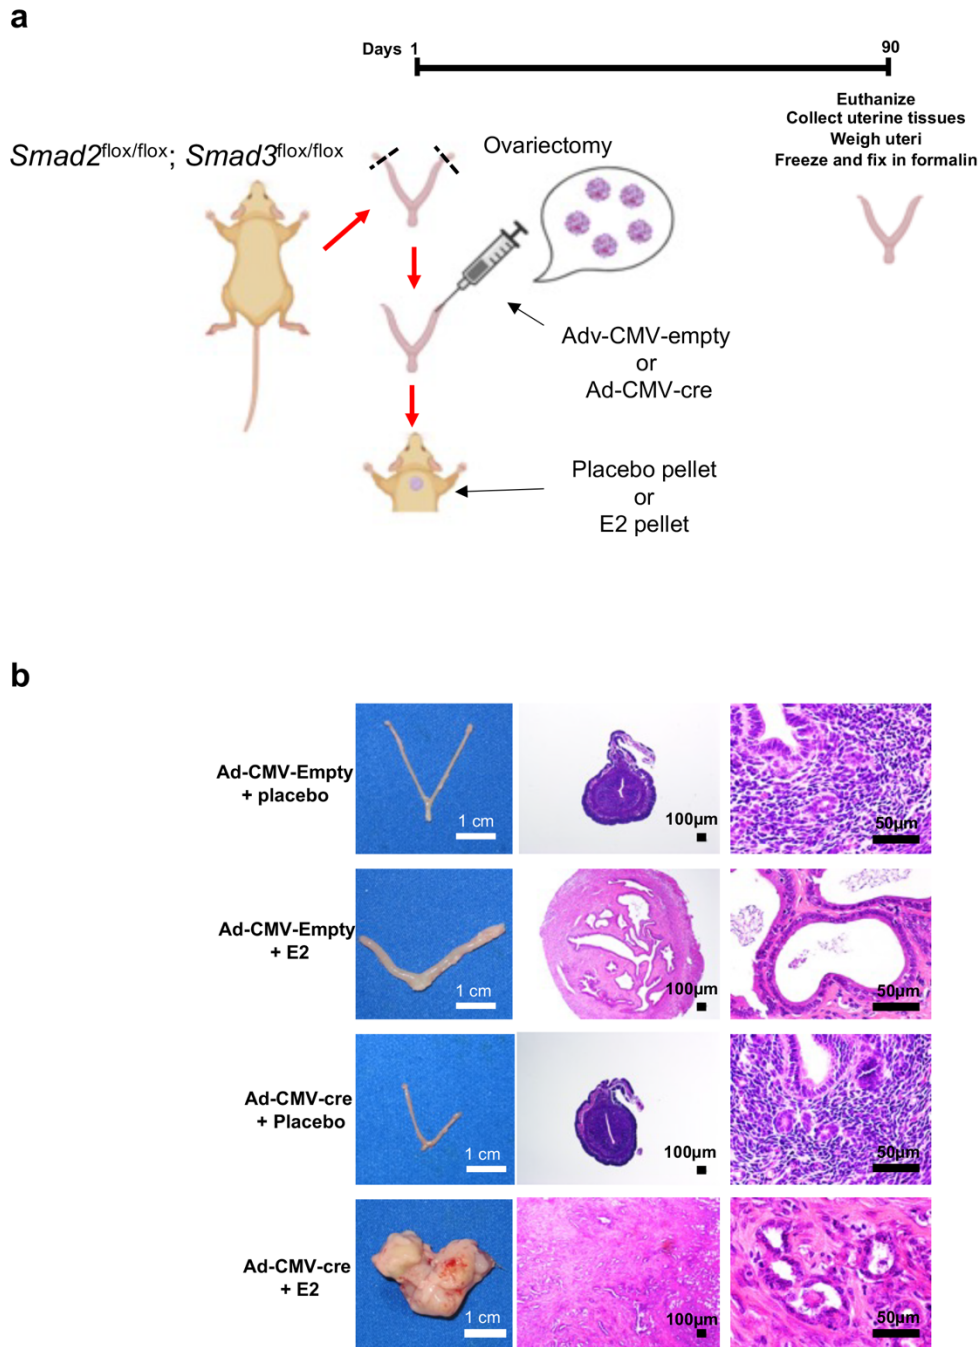

**Supplementary Fig. 5: Adenoviral-cre mediated SMAD2/3 deletion in mice.** **a** Diagram showing the schematic used to obtain adenoviral cre-mediated deletion of SMAD2 and SMAD3 in *Smad2*<sup>flox/flox</sup>;*Smad3*<sup>flox/flox</sup> mice by injection into the uterus of ovariectomized mice treated with a placebo or estradiol (E2) releasing pellet. **b** Analysis of the reproductive tracts 3-months after Ad-cre injection and placebo or E2 treatment. Administration of Ad-cre + E2 led to tumor development, while Ad-cre administration without E2 did not result in endometrial tumors. Experiments were performed in 2-3 mice per genotype.



## Supplementary Fig. 6

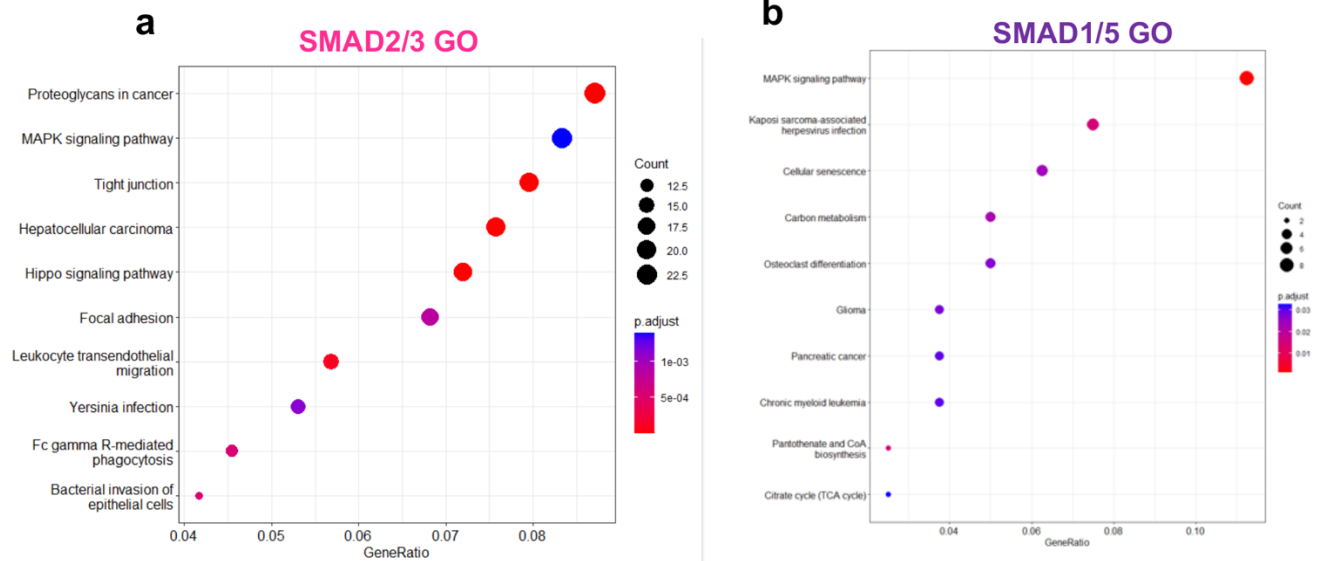

**Supplementary Fig. 6: Gene ontology classification in SMAD4-bound genes in endometrial organoids.** **a-b** Gene ontology classifications in the 607 SMAD4-bound genes downregulated in control organoids (representative of SMAD2/3 direct target genes, **a**), and in the 185 SMAD4-bound genes upregulated in *Smad2/3* cKO organoids (representing SMAD1/5 target genes, **b**).

**Supplementary Table 1.** Development of tumors from *Smad2/3* cKO mice is E2-dependent.

| <b>Treatment</b> | <b>Genotype</b>                 | <b>Uterine Weight (g)</b> | <b>Uterine tumor</b> | <b>Lung Mets</b> |
|------------------|---------------------------------|---------------------------|----------------------|------------------|
| <b>No E2</b>     | <b>Control (n=4)</b>            | <b>0.0185 ± 0.0034</b>    | <b>0/4</b>           | <b>0/4</b>       |
|                  | <b><i>Smad2/3</i> cKO (n=4)</b> | <b>0.025 ± 0.002</b>      | <b>0/4</b>           | <b>0/4</b>       |
| <b>E2 pellet</b> | <b>Control (n=4)</b>            | <b>0.1079 ± 0.0382</b>    | <b>0/4</b>           | <b>0/4</b>       |
|                  | <b><i>Smad2/3</i> cKO (n=4)</b> | <b>2.99 ± 0.66</b>        | <b>4/4</b>           | <b>2/4</b>       |

**Supplementary Table 2.** Primer sequences used for genotyping and quantitative PCR.

| <b>Gene</b>    | <b>Primer #</b> | <b>Sequence (5'-3')</b> |
|----------------|-----------------|-------------------------|
| <i>Smad2</i>   | F               | TACTTGGGGCAATCTTTTCG    |
|                | R               | GTCACTCCCTGAACCTGAAG    |
| <i>Smad3</i>   | F               | CTCCAGATCGTGGGCATACAGC  |
|                | R               | GGTCACAGGGTCCTCTGTGCC   |
| <i>Ltf-cre</i> | 1               | GTTTCCTCCTTCTGGGCTCC    |
|                | 2               | TTTAGTGCCCAGCTTCCCAG    |
|                | 3               | CCTGTTGTTTCAGCTTGCACC   |
| <i>Aldh1a1</i> | F               | ATACTTGTCGGATTTAGGAGGCT |
|                | R               | GGGCCTATCTTCCAAATGAACA  |
| <i>Aldh1a2</i> | F               | CAGAGAGTGGGAGAGTGTTCC   |
|                | R               | CACACAGAACCAAGAGAGAAGG  |
| <i>Aldh1a3</i> | F               | GGGTCACACTGGAGCTAGGA    |
|                | R               | CTGGCCTCTTCTTGCGAA      |
| <i>Cyp26a1</i> | F               | AAGCTCTGGGACCTGTACTGT   |
|                | R               | CTCCGCTGAAGCACCATCT     |
| <i>Lrat</i>    | F               | CCGTCCCTATGAAATCAGCTC   |
|                | R               | ATGGGCGACACGGTTTTCC     |
| <i>Rbp4</i>    | F               | CCACTGGATCATCGACACGG    |
|                | R               | GCCATTGGGGTCACGAGAA     |
| <i>Id1</i>     | F               | CCTAGCTGTTTCGCTGAAGGC   |
|                | R               | CTCCGACAGACCAAGTACCAC   |



|              |   |                        |
|--------------|---|------------------------|
| <i>Id2</i>   | F | ATGAAAGCCTTCAGTCCGGTG  |
|              | R | AGCAGACTCATCGGGTCGT    |
| <i>Id3</i>   | F | CGACCGAGGAGCCTCTTAG    |
|              | R | GGACGCGATAGGGAAGACC    |
| <i>Id4</i>   | F | ATGAAAGCCTTCAGTCCGGTG  |
|              | R | AGCAGACTCATCGGGTCGT    |
| <i>Smad2</i> | F | GCTCTTCTGGCTCAGTCTGTCA |
| Exon 10      | R | GGTGCACATTCGGGTTAGCT   |
| <i>Smad3</i> | F | TCACGTTATCTACTGCCGCC   |
| Exon 3       | R | AGCTCCATGGCCCGTAATTC   |

---

### Supplementary Table 3. Antibody information.

| Antigen               | Source         | Cat. No.    | Dilution               |
|-----------------------|----------------|-------------|------------------------|
| SMAD2                 | Cell Signaling | 5339        | WB 1:1000              |
| SMAD3                 | Cell Signaling | 9523        | WB 1:1000              |
| pSMAD2                | Cell Signaling | 3108S       | WB 1:200               |
| pSMAD2/3              | Cell Signaling | 8828S       | IHC 1:100              |
| SMA                   | Abcam          | Ab5694      | IHC 1:500              |
| Progesterone Receptor | Cell Signaling | 8757        | IHC 1:200              |
| FOXA2                 | Abcam          | ab108422    | IHC/IF 1:200           |
| ER $\alpha$           | Cell Signaling | 13258S      | IHC 1:200              |
| TTF1                  | Abcam          | Ab76013     | IHC, IF 1:200          |
| CDH1                  | Cell Signaling | 3195S       | IHC: 1:200             |
| CK8                   | DSHB           | TROMA-I     | IF 1:50                |
| MUC1                  | Novusbio       | NB120-15481 | IHC 1:200              |
| SMAD4                 | Abcam          | Ab40759     | 0.678 $\mu$ g/reaction |
| ALDH1A1               | Abcam          | Ab52492     | IHC 1:50               |
| ALDH1A2               | Sigma          | HPA010022   | IHC 1:500              |
| ALDH1A3               | GeneTex        | GTX110784   | IHC 1:100              |
| pSMAD1/5              | Cell Signaling | 9516        | IHC 1:200              |

### Supplementary Data Files

**Supplementary Data 1.** Gene ontology analysis of differentially expressed genes in endometrial organoids from control, control + A83-01, and *Smad2/3* cKO mice. *Attached as an excel spreadsheet.*

**Supplementary Data 2.** SMAD4 bound genes that are up- or down-regulated in RNAseq datasets of control and *Smad2/3* cKO organoids. 607 SMAD4-bound genes downregulated in *Smad2/3* cKO vs control organoids (representing SMAD2/3 target genes) and 185 SMAD4-bound genes upregulated in *Smad2/3* cKO vs. control organoids (representing SMAD1/5 target genes). *Attached as an excel spreadsheet.*

**Supplementary Data 3.** The source data behind the graphs in the paper. *Attached as an excel spreadsheet.*
